# Supplementary material for: Machine learning-guided discovery of ionic polymer electrolytes for lithium metal batteries
Source: PubMed Central journal article supplement (PMC10185508; doi:10.1038/s41467-023-38493-7), 2023-05-15
Supplement: 41467_2023_38493_MOESM1_ESM.pdf [file 41467_2023_38493_MOESM1_ESM.pdf]

# Supplementary Information

for

## Machine learning-guided discovery of ionic polymer electrolytes for lithium metal batteries

*Kai Li<sup>1</sup>, Jifeng Wang<sup>1</sup>, Yuanyuan Song<sup>1</sup>, Ying Wang<sup>1\*</sup>*

1. Department of Macromolecular Science  
State Key Laboratory of Molecular Engineering of Polymers  
Fudan University  
Shanghai, 200438, China  
Corresponding E-mail: [wying@fudan.edu.cn](mailto:wying@fudan.edu.cn)

### Contents

|                            |    |
|----------------------------|----|
| Supplementary Note 1 ..... | 2  |
| Supplementary Note 2 ..... | 2  |
| Supplementary Note 3 ..... | 3  |
| Supplementary Note 4 ..... | 3  |
| Supplementary Note 5 ..... | 4  |
| Supplementary Note 6 ..... | 5  |
| Supplementary Note 7 ..... | 6  |
| Supplementary Fig. 1.....  | 7  |
| Supplementary Fig. 2.....  | 8  |
| Supplementary Fig. 3.....  | 9  |
| Supplementary Fig. 4.....  | 10 |
| Supplementary Fig. 5.....  | 11 |
| Supplementary Fig. 6.....  | 12 |
| Supplementary Fig. 7.....  | 13 |
| Supplementary Table 1..... | 14 |
| Supplementary Table 2..... | 15 |
| Supplementary Table 3..... | 18 |
| Supplementary Table 4..... | 18 |
| Supplementary Table 5..... | 19 |
| Supplementary Table 6..... | 21 |
| Supplementary Table 7..... | 21 |

## Supplementary Note 1

To investigate the solubility of Li salts, here we introduce the concept of binding energy ( $E_{\text{binding}}$ ), which is the lowest energy required to combine the cation ( $\text{Li}^+$ ) and the anions to form the Li-anion pairs. The lower of the  $E_{\text{binding}}$  means easier for the  $\text{Li}^+$  and anions to stay in tightly associated pairs and pack into solid crystals. We observe that the  $E_{\text{binding}}$  of LiFSI ( $-512 \text{ kJ mol}^{-1}$ ) is significantly higher than that of LiTfO ( $-603 \text{ kJ mol}^{-1}$ ) and  $\text{LiBF}_4$  ( $-602.39 \text{ kJ mol}^{-1}$ ), this explains the high solubility of LiFSI in ionic liquids compared to the other salts. The  $E_{\text{binding}}$  is calculated based on Equation 1 in the manuscript. The used theory and basis set is M062X/6-311(+)-G(2d,p) with dispersion correction of DFT-D3.

## Supplementary Note 2

The Nernst-Einstein equation correlates the conductivity ( $\sigma$ ) to the diffusion coefficients of cation ( $D^+$ ) and anion ( $D^-$ ) in the system. The Stokes-Einstein equation displays the relationship among the viscosity ( $\eta$ ), diffusion coefficients ( $D$ ) and radii of gyration ( $r$ ) of the ions or molecules. Thus, we can derive the relationship between the ionic conductivity and the viscosity of the system.

$$\text{Nernst-Einstein Equation} \quad \sigma = \frac{z_i^2 F^2}{RT} (D^+ + D^-) \quad \text{Equation (1)}$$

$$\text{Stoke-Einstein Equation} \quad D = \frac{k_B T}{6\pi\eta r} \quad \text{Equation (2)}$$

### Supplementary Note 3

As indicated in previous literature,<sup>1,2</sup> the uncertainty of the comparison for different cation and anion types is highly related to the limitation of the HOMO/LUMO theory, for example, the  $C_{2mim}BF_4$  is usually overestimated with a “weak” cation paired with a strong anion. For the cations, the imidazolium type is also not accurate, because the description of the top of the valence band for some of the imidazolium based ILs is not very accurate using the DFT and related approximations, especially for the imidazolium ones with  $BF_4$  anions. However, the overall trend of the ECW values is reliable and showed enough accuracy for screening of potential ILs in this application.

### Supplementary Note 4

Here is the list of the 16 factors used for the hierarchical clustering of the unsupervised learning. The top 15 factors are obtained from the XGBoosting model for the conductivity classification task. The last factor is ECW\_computed calculated based on the HOMO/LUMO theory through Psi4 as described in the manuscript.

1. "MaxPartialCharge\_anion",
2. "PMI2\_cation",
3. "energy\_anion",
4. "RadiusOfGyration\_pair",
5. "FpDensityMorgan2\_anion",
6. "Eccentricity\_pair",
7. "PMI2\_pair",

8. "Asphericity\_anion",
9. "volume\_pair",
10. "Asphericity\_pair",
11. "HOMO\_cation",
12. "volume\_cation",
13. "PMI3\_pair",
14. "FpDensityMorgan1\_pair",
15. "RadiusOfGyration\_anion
16. "'ECW\_computed'

### Supplementary Note 5

The Graph Convolutional Neural Network (GCN) was built upon the combination of RDKit and PyTorch Geometrics. The RDKit offers the node and edge features of cations and anions. PyTorch takes charge of the train and prediction work. The GCN model as below has two convolutional layers followed with the graph prediction layer. The iteration epoch times is 1000 to ensure stable accuracy values. The code is included in the class object published on GitHub ([https://github.com/WangsGroupFDU/IL\\_machine\\_learning](https://github.com/WangsGroupFDU/IL_machine_learning)).

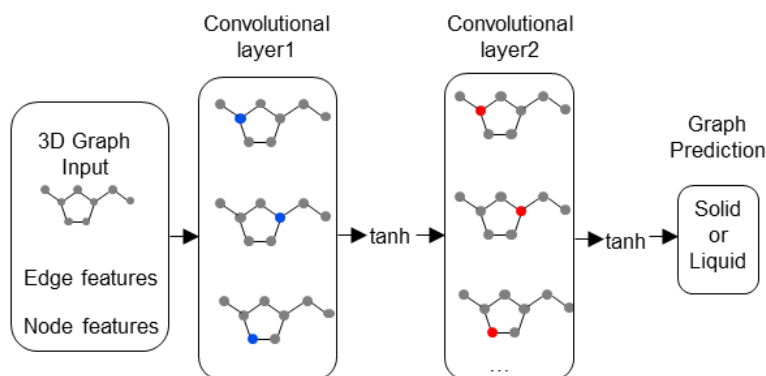

## Supplementary Note 6

The  $R^2$  value is widely used to validate the performance of the models based on the predicted values and experimental values. It is very difficult to directly correlate the performance of the model with the  $R^2$  determinant. The  $R^2$  value is highly dependent on many factors, including the sample size, the data sources and the sample uniqueness, thus we have to evaluate case by case.

As far as we know, most of the related literature using machine learning to predict ionic conductivity are based on the ILThermo database, which contains 7234 entries of ionic conductivity values at varying temperatures for only 523 unique ILs, the unique cations and anions are high up to 244 and 109 correspondingly, indicating the database is highly sparse. In addition, we can estimate that there are  $\sim 14$  ( $7234/523$ ) records for every unique ionic liquid in the dataset, thus there must be a large number of same ILs appearing both in the training and testing dataset, which will boost the  $R^2$  and lead to the overfitting of the model. Besides, the validation reported in the literature usually relies on the ILThermo database itself. There is seldom validation work using an external database. We didn't find other reported  $R^2$  in the literature, which compares the unique ILs with external database at a single temperature as we report here.

When we do the comparison, 4 ILs contain more than two records as shown in Supplementary Table 6, but the variation between the two records is very high, this uncertainty from the database (experimental values) itself will further increase the fluctuation of our validation shown in Figure 2. Thus, we leave out this invalid value point for 1-butylpyridinium dicyanamide with a huge percentage of difference for the measured values ( $> 66\%$ ). Even though

there are only 18 overlaps between the two datasets, we find that the model did a nice job to predict IL especially with high ionic conductivity, which is one of our targets.

Above all, we conclude that the model is important and the distinctive  $R^2$  value is insightful to the field. This also indicates that we can pay more attention to the commonly existing bias of the database collection and management for future ML investigations.

### Supplementary Note 7

The  $t_{Li}^+$  of Bruce-Vincent analysis is defined in Equation (3), where  $I_0$  is the current at the starting point of polarization,  $I_{ss}$  is the steady state current at the end of the polarization.  $R_0$  and  $R_{ss}$  refer to the initial resistances of the first semi-circle before and after polarization, respectively. The frequency range used is 1Hz – 1MHz. The impedance spectra are attached in Supplementary Table 7.

$$t_{Li}^+ = \frac{I_{ss}(\Delta V - I_0 R_0)}{I_0(\Delta V - I_{ss} R_{ss})} \quad \text{Equation (3)}$$

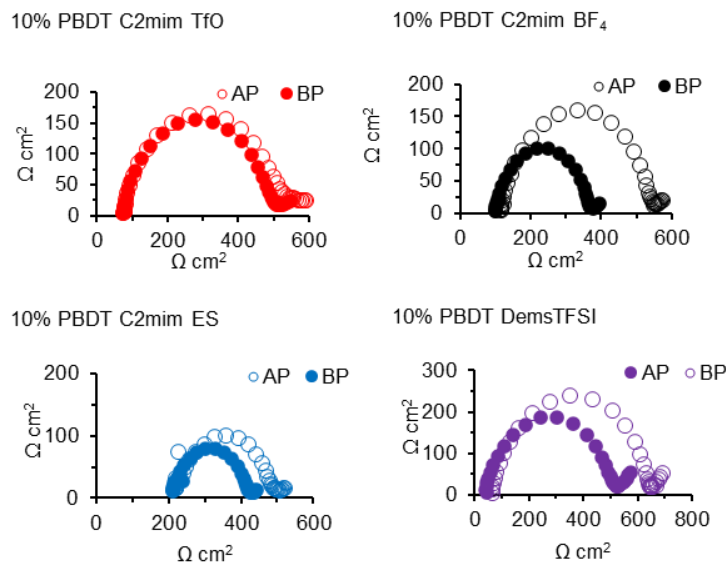

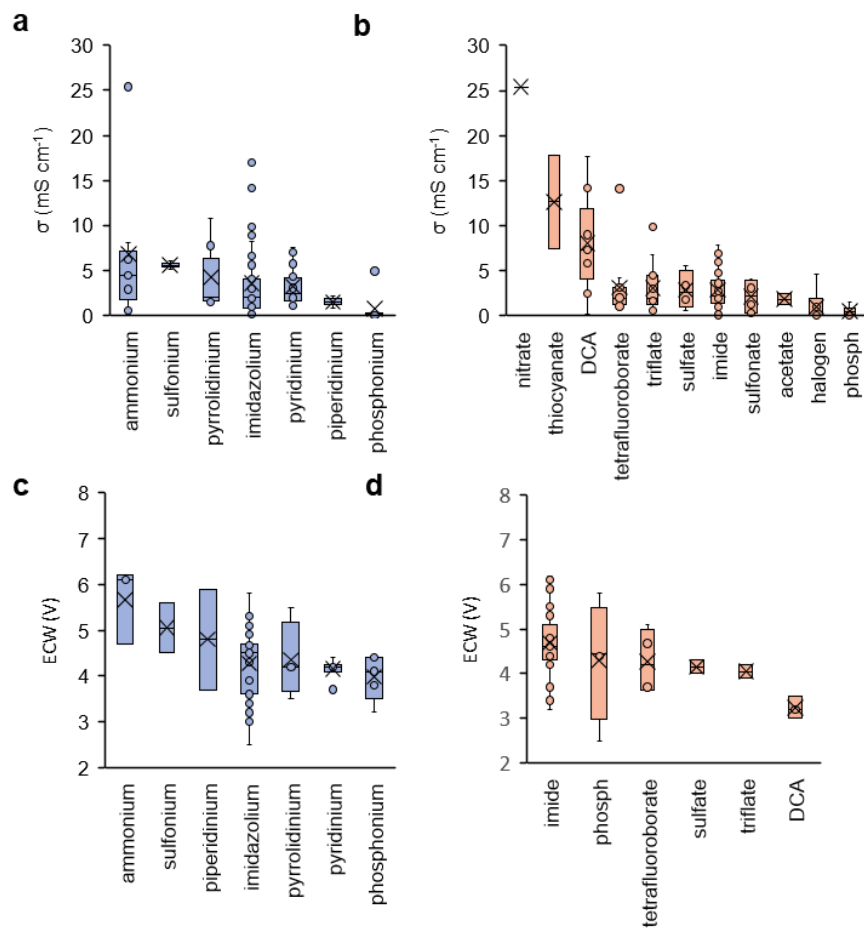

**Supplementary Fig. 1.**

The conductivity and ECW boxplots for the ILs classified by the cation and anion types. (a, b) The boxplots of the ILs with known conductivity ( $\sigma$ ) classified by the cation and anion types, corresponding. In terms of the cations, the average ionic conductivity ( $\sigma$ ) follows the order of ammonium > sulfonium > pyrrolidinium > imidazolium > pyridinium > piperidinium > phosphonium. Accordingly, the rule for the anions is nitrate > thiocyanate > DCA > BF<sub>4</sub> > triflate > sulfate > imide > sulfonate > acetate > halogen > phosph. (c, d) The boxplots of the ILs with known ECWs classified by the cation and anion types, correspondingly.

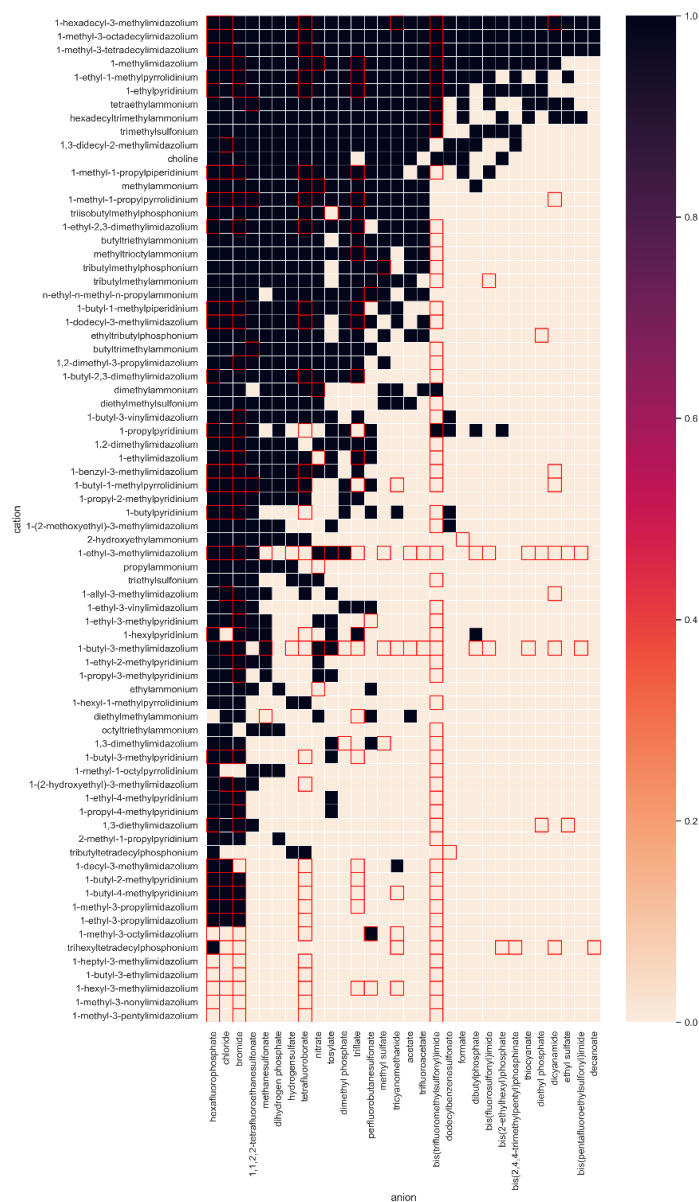

Supplementary Fig. 2

Heatmap for the solid/liquid prediction results as shown in a permutation table between cations and anions. The black squares indicate solid IL pairs at room temperature. The pink squares refer to liquid IL pairs at room temperature. The patch highlighted with red squares are IL pairs with known state in the dataset.



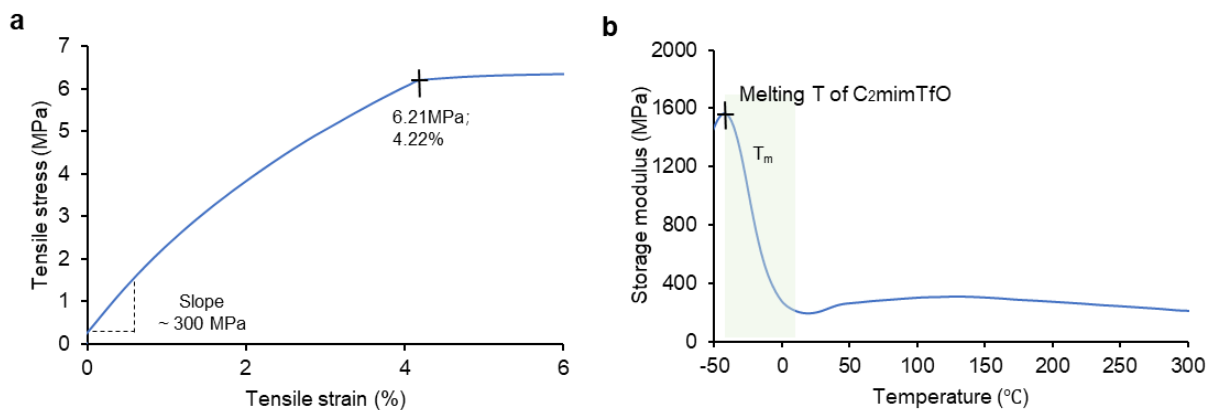

### Supplementary Fig. 3

The mechanical properties of IPEs. (a) The stress-strain curve for IPE with 10% PBBDT and C2mim TfO. (b) The corresponding DMA curve for IPE with 10% PBBDT and C2mim TfO from  $-50$  to  $300$  °C.

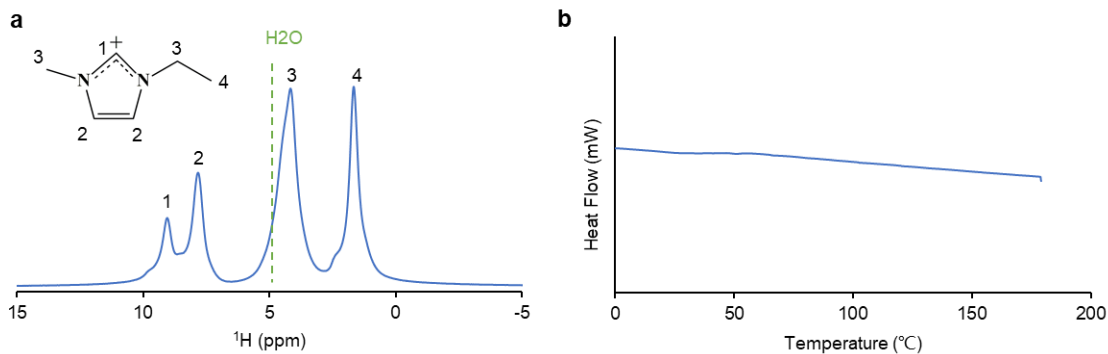

### Supplementary Fig. 4

Quantification of H<sub>2</sub>O amount in the IPEs using NMR and DSC. (a) <sup>1</sup>H NMR spectra for the membrane. The green dashed line shows the regular position (4.9 ppm) of H<sub>2</sub>O peak. H<sub>2</sub>O does not have a detrimental effect on the performance of Li metal batteries. For this reason, the developed composite membranes of PBDT and ILs formed in the first step were placed in a vacuum oven at 80 °C for more than 24h to adequately remove water before assembly in the batteries. Here we mainly need to measure the H<sub>2</sub>O in the dried membrane (10% PBDT C2mim TfO). We observe no distinct signal that belongs to H<sub>2</sub>O, which usually appears around 4.9 ppm, for the membrane. (b) DSC curve for the membrane. Notably, we observe no apparent heat absorption peaks above 100 °C, which indicates that H<sub>2</sub>O molecules were successfully removed after the vacuum drying step. The excellent battery cycling performance in the manuscript also confirms that the effect of H<sub>2</sub>O can be neglected in the IPEs. The second ion exchange process was finished in an Ar-filled glove box (< 0.01 ppm H<sub>2</sub>O).

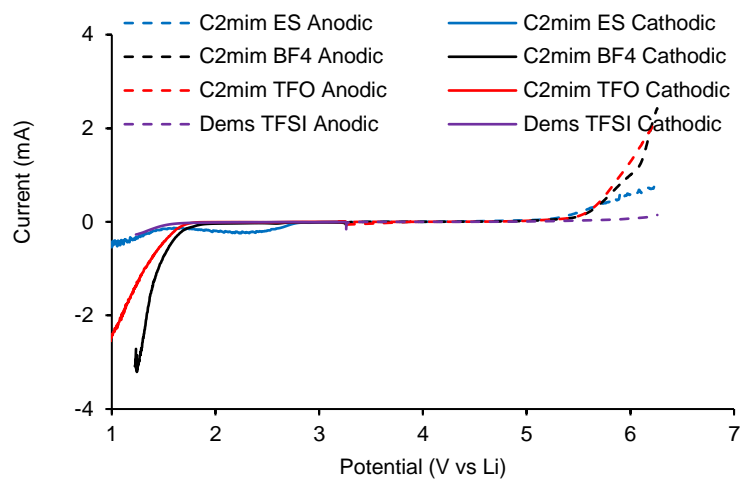

**Supplementary Fig. 5**

The ECW values for selected pure ILs. The electrochemical window of neat ILs using three electrodes design with Ag|AgCl (3M KCl) as the reference electrode and Pt as both the working and counter electrodes with diameter of 3 mm. The voltage has been converted based on the Li|Li<sup>+</sup> potential.

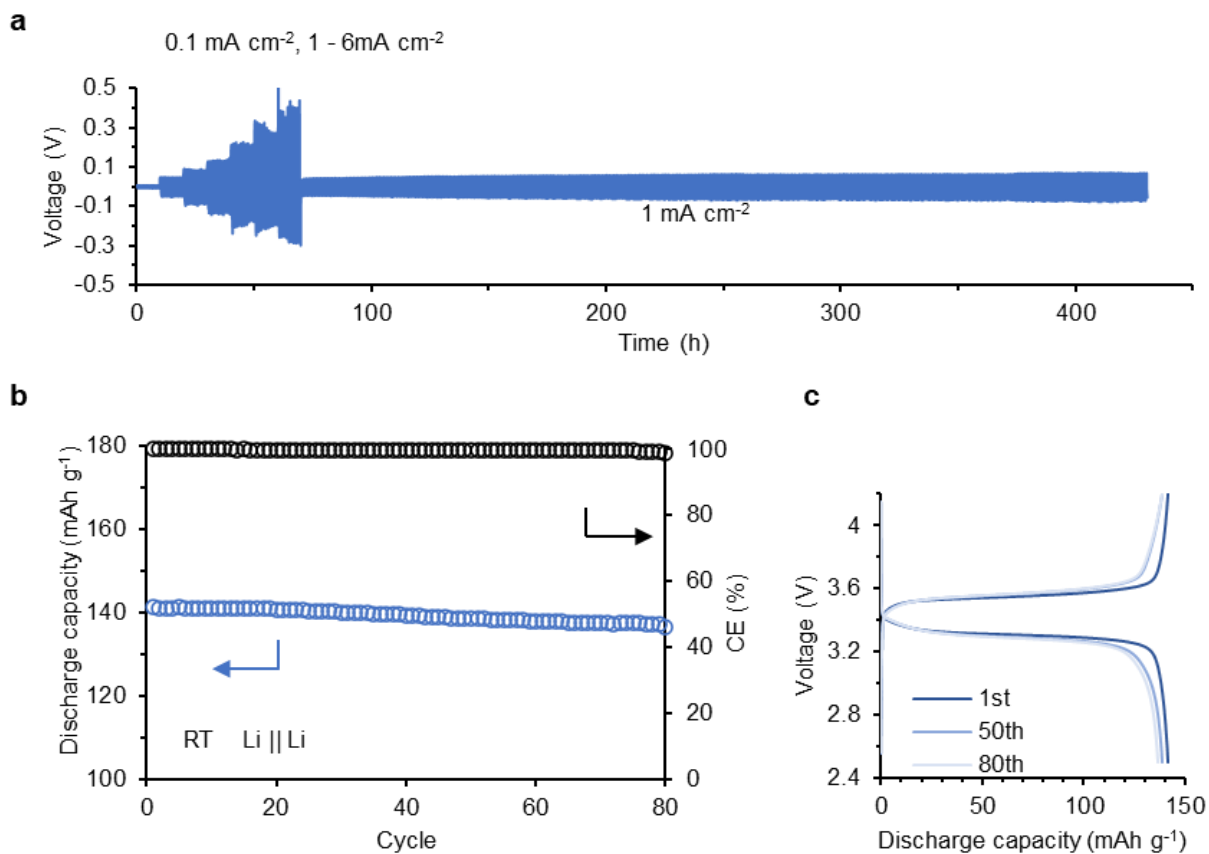

**Supplementary Fig. 6**

The cycling performance of IPEs based on DemstFSI. (a) Cell voltage versus time for a symmetric Li|IPEs-DemstFSI|Li cell at current densities ( $J$ ) from 0.1 to 6 mA·cm<sup>-2</sup> with changes in  $J$  every 10 cycles at room temperature (each cycle lasts 1 h). (b) Cycling performance of Li|IPEs-DemstFSI|LiFePO<sub>4</sub> cell at 0.5C (0.83 mA cm<sup>-2</sup>) at RT. The blue circles show the specific discharge capacity as a function of the increasing cycle number. The black circles display the CE for each cycle correspondingly. (c) The voltage-capacity profiles for the main cycles in (d).

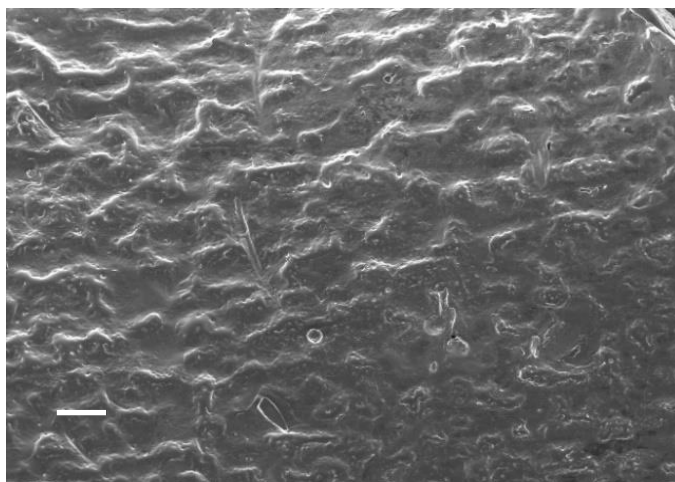

**Supplementary Fig. 7**

SEM image of the cycled Li metal surface. The scale bar is 100  $\mu\text{m}$ . We observe no Li dendrite formed on the Li metal surface for the Li||Cu cell, which indicates the formation of stable SEI in Li metal surface based on the developed IPEs.

### Supplementary Table 1

The calculated binding energies for selected cations and anions pairs (19) labeled with phase at RT from IoLiTec.

| cation                         | anion                     | $E_{opt}[-]$<br>(Hartee) | $E_{opt}[+]$<br>(Hartee) | $E_{opt}[+][-]$<br>(Hartee) | $E_{binding}$<br>(kJmol <sup>-1</sup> ) | State<br>IoliTec |
|--------------------------------|---------------------------|--------------------------|--------------------------|-----------------------------|-----------------------------------------|------------------|
| 1-methyl-1-propylpyrrolidinium | chloride                  | -460.27                  | -370.14                  | -830.55                     | -385                                    | solid            |
| 1-butyl-1-methylpiperidinium   | chloride                  | -460.27                  | -448.75                  | -909.16                     | -389                                    | solid            |
| 1-ethyl-3-methylimidazolium    | chloride                  | -460.27                  | -344.48                  | -804.90                     | -403                                    | solid            |
| methylammonium                 | nitrate                   | -280.35                  | -96.19                   | -376.74                     | -528                                    | solid            |
| 1-ethyl-3-methylimidazolium    | nitrate                   | -280.35                  | -344.48                  | -624.98                     | -398                                    | solid            |
| 1-ethyl-3-methylimidazolium    | tosylate                  | -894.82                  | -344.48                  | -1239.46                    | -407                                    | solid            |
| 1-methyl-1-propylpyrrolidinium | triflate                  | -961.56                  | -370.14                  | -1331.84                    | -371                                    | solid            |
| 1-butyl-1-methylpiperidinium   | triflate                  | -961.56                  | -448.75                  | -1410.44                    | -361                                    | solid            |
| 1-methyl-1-propylpyrrolidinium | tetrafluoroborate         | -424.56                  | -370.14                  | -794.84                     | -387                                    | solid            |
| 1-butyl-1-methylpiperidinium   | tetrafluoroborate         | -424.56                  | -448.75                  | -873.44                     | -369                                    | solid            |
| 1-ethyl-3-methylimidazolium    | bis(fluoro sulfonyl)imide | -1351.73                 | -344.48                  | -1696.35                    | -358                                    | liquid           |
| 1-ethyl-3-methylimidazolium    | methanesulfonate          | -663.80                  | -344.48                  | -1008.44                    | -415                                    | liquid           |
| 1-ethyl-3-methylimidazolium    | ethyl sulfate             | -778.33                  | -344.48                  | -1122.97                    | -397                                    | liquid           |
| 1-ethyl-3-methylimidazolium    | thiocyanate               | -491.10                  | -344.48                  | -835.73                     | -377                                    | liquid           |
| 1-ethyl-3-methylimidazolium    | triflate                  | -961.56                  | -344.48                  | -1306.18                    | -376                                    | liquid           |
| 1-ethyl-3-methylimidazolium    | tetrafluoroborate         | -424.56                  | -344.48                  | -769.19                     | -387                                    | liquid           |
| 1-methyl-1-propylpyrrolidinium | dicyanamide               | -240.49                  | -370.14                  | -610.76                     | -355                                    | liquid           |
| 1-ethyl-3-methylimidazolium    | dicyanamide               | -240.49                  | -344.48                  | -585.11                     | -369                                    | liquid           |
| 1-ethyl-3-methylimidazolium    | acetate                   | -228.51                  | -344.48                  | -573.16                     | -440                                    | liquid           |

## Supplementary Table 2

The calculated binding energies for selected cations and anions pairs (72) labeled with predicted phases at RT.

| cation                         | anion                    | $E_{opt}[-]$<br>(Hartee) | $E_{opt}[+]$<br>(Hartee) | $E_{opt}[+][-]$<br>(Hartee) | $E_{binding}$<br>(kJmol <sup>-1</sup> ) | State<br>Predict |
|--------------------------------|--------------------------|--------------------------|--------------------------|-----------------------------|-----------------------------------------|------------------|
| 1-methyl-1-propylpyrrolidinium | bis(fluorosulfonyl)imide | -1351.73                 | -370.14                  | -1722.00                    | -347                                    | Liquid           |
| 1-butyl-1-methylpiperidinium   | bis(fluorosulfonyl)imide | -1351.73                 | -448.75                  | -1800.61                    | -342                                    | Liquid           |
| diethylmethylsulfonium         | bis(fluorosulfonyl)imide | -1351.73                 | -556.94                  | -1908.80                    | -353                                    | Liquid           |
| 1-ethyl-3-methylpyridinium     | bis(fluorosulfonyl)imide | -1351.73                 | -366.54                  | -1718.39                    | -337                                    | Liquid           |
| ethyltributylphosphonium       | bis(fluorosulfonyl)imide | -1351.73                 | -893.80                  | -2245.66                    | -330                                    | Liquid           |
| ethyltributylphosphonium       | nitrate                  | -280.35                  | -893.80                  | -1174.30                    | -382                                    | Liquid           |
| 1-ethyl-3-methylimidazolium    | dihydrogen phosphate     | -643.63                  | -344.48                  | -988.28                     | -440                                    | Liquid           |
| ethyltributylphosphonium       | dihydrogen phosphate     | -643.63                  | -893.80                  | -1537.60                    | -435                                    | Liquid           |
| ethyltributylphosphonium       | methanesulfonate         | -663.80                  | -893.80                  | -1557.76                    | -400                                    | Liquid           |
| 1-ethyl-3-methylpyridinium     | tosylate                 | -894.82                  | -366.54                  | -1261.51                    | -391                                    | Liquid           |
| ethyltributylphosphonium       | tosylate                 | -894.82                  | -893.80                  | -1788.78                    | -389                                    | Liquid           |
| methylammonium                 | ethyl sulfate            | -778.33                  | -96.19                   | -874.71                     | -496                                    | Liquid           |
| 1-methyl-1-propylpyrrolidinium | ethyl sulfate            | -778.33                  | -370.14                  | -1148.62                    | -385                                    | Liquid           |
| 1-butyl-1-methylpiperidinium   | ethyl sulfate            | -778.33                  | -448.75                  | -1227.23                    | -389                                    | Liquid           |
| diethylmethylsulfonium         | ethyl sulfate            | -778.33                  | -556.94                  | -1335.42                    | -405                                    | Liquid           |
| 1-ethyl-3-methylpyridinium     | ethyl sulfate            | -778.33                  | -366.54                  | -1145.02                    | -393                                    | Liquid           |
| ethyltributylphosphonium       | ethyl sulfate            | -778.33                  | -893.80                  | -1672.28                    | -384                                    | Liquid           |

|                                |                   |         |         |          |      |         |
|--------------------------------|-------------------|---------|---------|----------|------|---------|
| methylammonium                 | thiocyanate       | -491.10 | -96.19  | -587.47  | -466 | Liquid  |
| 1-methyl-1-propylpyrrolidinium | thiocyanate       | -491.10 | -370.14 | -861.38  | -376 | Liquid  |
| 1-butyl-1-methylpiperidinium   | thiocyanate       | -491.10 | -448.75 | -939.99  | -370 | Liquid  |
| diethylmethylsulfonium         | thiocyanate       | -491.10 | -556.94 | -1048.18 | -383 | Liquid  |
| 1-ethyl-3-methylpyridinium     | thiocyanate       | -491.10 | -366.54 | -857.78  | -365 | Liquid  |
| ethyltributylphosphonium       | thiocyanate       | -491.10 | -893.80 | -1385.04 | -354 | Liquid  |
| ethyltributylphosphonium       | triflate          | -961.56 | -893.80 | -1855.50 | -358 | Liquid  |
| 1-ethyl-3-methylpyridinium     | tetrafluoroborate | -424.56 | -366.54 | -791.24  | -376 | Liquid  |
| 1-ethyl-3-methylimidazolium    | tricyanomethanide | -316.69 | -344.48 | -661.31  | -356 | Liquid  |
| diethylmethylsulfonium         | tricyanomethanide | -316.69 | -556.94 | -873.75  | -331 | Liquid  |
| 1-ethyl-3-methylpyridinium     | tricyanomethanide | -316.69 | -366.54 | -683.36  | -343 | Liquid  |
| ethyltributylphosphonium       | tricyanomethanide | -316.69 | -893.80 | -1210.62 | -327 | Liquid  |
| methylammonium                 | dicyanamide       | -240.49 | -96.19  | -336.85  | -452 | Liquid  |
| 1-butyl-1-methylpiperidinium   | dicyanamide       | -240.49 | -448.75 | -689.37  | -355 | Liquid  |
| diethylmethylsulfonium         | dicyanamide       | -240.49 | -556.94 | -797.56  | -356 | Liquid  |
| 1-ethyl-3-methylpyridinium     | dicyanamide       | -240.49 | -366.54 | -607.17  | -364 | Liquid  |
| ethyltributylphosphonium       | dicyanamide       | -240.49 | -893.80 | -1134.43 | -349 | Liquid  |
| 1-methyl-1-propylpyrrolidinium | acetate           | -228.51 | -370.14 | -598.81  | -438 | Liquid  |
| 1-butyl-1-methylpiperidinium   | acetate           | -228.51 | -448.75 | -677.41  | -420 | Liquid  |
| diethylmethylsulfonium         | acetate           | -228.51 | -556.94 | -785.61  | -438 | Liquid  |
| 1-ethyl-3-methylpyridinium     | acetate           | -228.51 | -366.54 | -595.20  | -412 | Liquid  |
| ethyltributylphosphonium       | acetate           | -228.51 | -893.80 | -1122.47 | -416 | Liquid  |
| ethyltributylphosphonium       | chloride          | -460.27 | -893.80 | -1354.22 | -387 | Solid-1 |



|                                |                          |          |         |          |      |         |
|--------------------------------|--------------------------|----------|---------|----------|------|---------|
| methylammonium                 | bis(fluorosulfonyl)imide | -1351.73 | -96.19  | -1448.08 | -430 | Solid-1 |
| diethylmethylsulfonium         | dihydrogen phosphate     | -643.63  | -556.94 | -1200.73 | -448 | Solid-1 |
| diethylmethylsulfonium         | methanesulfonate         | -663.80  | -556.94 | -1220.90 | -422 | Solid-1 |
| 1-ethyl-3-methylpyridinium     | methanesulfonate         | -663.80  | -366.54 | -1030.49 | -406 | Solid-1 |
| 1-methyl-1-propylpyrrolidinium | tosylate                 | -894.82  | -370.14 | -1265.11 | -380 | Solid-1 |
| 1-butyl-1-methylpiperidinium   | tosylate                 | -894.82  | -448.75 | -1343.71 | -356 | Solid-1 |
| diethylmethylsulfonium         | tosylate                 | -894.82  | -556.94 | -1451.92 | -409 | Solid-1 |
| diethylmethylsulfonium         | triflate                 | -961.56  | -556.94 | -1518.63 | -376 | Solid-1 |
| 1-ethyl-3-methylpyridinium     | triflate                 | -961.56  | -366.54 | -1328.23 | -368 | Solid-1 |
| 1-butyl-1-methylpiperidinium   | tricyanome thanide       | -316.69  | -448.75 | -765.56  | -329 | Solid-1 |
| methylammonium                 | chloride                 | -460.27  | -96.19  | -556.65  | -525 | Solid-2 |
| 1-methyl-1-propylpyrrolidinium | nitrate                  | -280.35  | -370.14 | -650.64  | -385 | Solid-2 |
| 1-butyl-1-methylpiperidinium   | nitrate                  | -280.35  | -448.75 | -729.24  | -384 | Solid-2 |
| diethylmethylsulfonium         | nitrate                  | -280.35  | -556.94 | -837.44  | -404 | Solid-2 |
| 1-ethyl-3-methylpyridinium     | nitrate                  | -280.35  | -366.54 | -647.04  | -390 | Solid-2 |
| 1-ethyl-3-methylpyridinium     | dihydrogen phosphate     | -643.63  | -366.54 | -1010.33 | -425 | Solid-2 |
| 1-butyl-1-methylpiperidinium   | Methanesulfonate         | -663.80  | -448.75 | -1112.70 | -398 | Solid-2 |
| methylammonium                 | tosylate                 | -894.82  | -96.19  | -991.20  | -501 | Solid-2 |
| diethylmethylsulfonium         | tetrafluoroborate        | -424.56  | -556.94 | -981.64  | -389 | Solid-2 |
| methylammonium                 | tricyanome thanide       | -316.69  | -96.19  | -413.03  | -404 | Solid-2 |
| 1-methyl-1-propylpyrrolidinium | tricyanome thanide       | -316.69  | -370.14 | -686.95  | -332 | Solid-2 |
| methylammonium                 | acetate                  | -228.51  | -96.19  | -324.93  | -623 | Solid-2 |
| diethylmethylsulfonium         | chloride                 | -460.27  | -556.94 | -1017.36 | -418 | Solid-3 |
| 1-ethyl-3-                     | chloride                 | -460.27  | -366.54 | -826.95  | -386 | Solid-3 |

|                                |                      |         |         |          |      |         |
|--------------------------------|----------------------|---------|---------|----------|------|---------|
| methylpyridinium               |                      |         |         |          |      |         |
| methylammonium                 | dihydrogen phosphate | -643.63 | -96.19  | -740.03  | -575 | Solid-3 |
| 1-methyl-1-propylpyrrolidinium | dihydrogen phosphate | -643.63 | -370.14 | -1013.93 | -416 | Solid-3 |
| 1-butyl-1-methylpiperidinium   | dihydrogen phosphate | -643.63 | -448.75 | -1092.54 | -417 | Solid-3 |
| methylammonium                 | Methane sulfonate    | -663.80 | -96.19  | -760.18  | -517 | Solid-3 |
| 1-methyl-1-propylpyrrolidinium | Methane sulfonate    | -663.80 | -370.14 | -1034.09 | -393 | Solid-3 |
| methylammonium                 | triflate             | -961.56 | -96.19  | -1057.92 | -463 | Solid-3 |
| methylammonium                 | tetrafluoroborate    | -424.56 | -96.19  | -520.92  | -471 | Solid-3 |
| ethyltributylphosphonium       | tetrafluoroborate    | -424.56 | -893.80 | -1318.50 | -369 | Solid-3 |

### Supplementary Table 3

ANOVA results for the hypothesis testing.

| <i>Source of Variation</i> | <i>SS</i> | <i>df</i> | <i>MS</i> | <i>F</i> | <i>P-value</i> | <i>F crit</i> |
|----------------------------|-----------|-----------|-----------|----------|----------------|---------------|
| Between Groups             | 38521.58  | 3         | 12840.53  | 4.77142  | 0.004459       | 2.739502      |
| Within Groups              | 182997.1  | 68        | 2691.134  |          |                |               |
| Total                      | 221518.7  | 71        |           |          |                |               |

### Supplementary Table 4

T-test with unequal variance results for the hypothesis testing.

| <i>t-test</i>               | <i>p-val(one_tail)</i> | <i>t_Stat</i> | <i>t_Critical</i> | <i>df</i> |
|-----------------------------|------------------------|---------------|-------------------|-----------|
| Liquid vs. Solid-1/3        | 0.299                  | 0.53          | 1.667             | 48        |
| <b>Liquid vs. Solid-2/3</b> | <b>0.0057</b>          | <b>2.63</b>   | <b>1.676</b>      | <b>49</b> |
| <b>Liquid vs. Solid-3/3</b> | <b>0.00047</b>         | <b>3.53</b>   | <b>1.678</b>      | <b>47</b> |
| <b>Liquid vs. Solid-all</b> | <b>0.002559</b>        | <b>2.89</b>   | <b>1.667</b>      | <b>70</b> |

### Supplementary Table 5

The final recommendation list with 49 ILs for IPEs.

| Pair                                                           | ECW (V) | $\sigma$ (mS cm <sup>-1</sup> ) | Cation        | Anion             |
|----------------------------------------------------------------|---------|---------------------------------|---------------|-------------------|
| 1-ethyl-3-methylpyridinium bis(trifluoromethylsulfonyl)imide   | 5.0     | 6.2                             | pyridinium    | imide             |
| 1-ethyl-3-methylpyridinium bis(fluorosulfonyl)imide            | 5.4     | 6.2                             | pyridinium    | imide             |
| 1,3-diethylimidazolium bis(trifluoromethylsulfonyl)imide       | 6.1     | 6.9                             | imidazolium   | imide             |
| 1,3-diethylimidazolium bis(fluorosulfonyl)imide                | 6.6     | 6.8                             | imidazolium   | imide             |
| 1,3-dimethylimidazolium bis(trifluoromethylsulfonyl)imide      | 6.0     | 7.8                             | imidazolium   | imide             |
| 1,3-dimethylimidazolium ethyl sulfate                          | 4.9     | 4.1                             | imidazolium   | sulfate           |
| 1,3-dimethylimidazolium trifluoroacetate                       | 4.5     | 6.5                             | imidazolium   | acetate           |
| 1,3-dimethylimidazolium tetrafluoroborate                      | 8.6     | 12.9                            | imidazolium   | tetrafluoroborate |
| 1,3-dimethylimidazolium bis(fluorosulfonyl)imide               | 6.5     | 7.9                             | imidazolium   | imide             |
| 1-(2-hydroxyethyl)-3-methylimidazolium nitrate                 | 4.3     | 10.1                            | imidazolium   | nitrate           |
| 1-allyl-3-methylimidazolium bis(fluorosulfonyl)imide           | 6.6     | 7.3                             | imidazolium   | imide             |
| 1-ethyl-3-methylimidazolium bis(trifluoromethylsulfonyl)imide  | 6.1     | 6.6                             | imidazolium   | imide             |
| 1-ethyl-3-methylimidazolium triflate                           | 5.5     | 9.8                             | imidazolium   | triflate          |
| 1-ethyl-3-methylimidazolium ethyl sulfate                      | 4.9     | 5.6                             | imidazolium   | sulfate           |
| 1-ethyl-3-methylimidazolium trifluoroacetate                   | 4.5     | 6.1                             | imidazolium   | acetate           |
| 1-ethyl-3-methylimidazolium tetrafluoroborate                  | 8.6     | 14.1                            | imidazolium   | tetrafluoroborate |
| 1-ethyl-3-methylimidazolium bis(fluorosulfonyl)imide           | 6.5     | 8.3                             | imidazolium   | imide             |
| 1-methyl-1-propylpyrrolidinium bis(fluorosulfonyl)imide        | 6.7     | 6.5                             | pyrrolidinium | imide             |
| 1-methyl-3-propylimidazolium bis(trifluoromethylsulfonyl)imide | 6.1     | 5.5                             | imidazolium   | imide             |
| 1-methyl-3-propylimidazolium triflate                          | 5.6     | 6.1                             | imidazolium   | triflate          |
| 1-methyl-3-propylimidazolium bis(fluorosulfonyl)imide          | 6.5     | 6.5                             | imidazolium   | imide             |
| 1-propyl-3-methylpyridinium bis(trifluoromethylsulfonyl)imide  | 5.0     | 6.2                             | pyridinium    | imide             |
| 1-propyl-3-methylpyridinium                                    | 5.5     | 5.6                             | pyridinium    | imide             |

|                                                               |     |      |             |                   |
|---------------------------------------------------------------|-----|------|-------------|-------------------|
| bis(fluorosulfonyl)imide                                      |     |      |             |                   |
| 2-hydroxyethylammonium<br>bis(fluorosulfonyl)imide            | 5.6 | 8.9  | ammonium    | imide             |
| butyltrimethylammonium<br>bis(fluorosulfonyl)imide            | 6.6 | 5.6  | ammonium    | imide             |
| diethylmethylammonium triflate                                | 5.5 | 6.7  | ammonium    | triflate          |
| diethylmethylammonium ethyl sulfate                           | 4.8 | 3.7  | ammonium    | sulfate           |
| diethylmethylammonium trifluoroacetate                        | 4.4 | 6.3  | ammonium    | acetate           |
| diethylmethylammonium tetrafluoroborate                       | 8.5 | 8.4  | ammonium    | tetrafluoroborate |
| diethylmethylammonium<br>bis(fluorosulfonyl)imide             | 6.4 | 6.6  | ammonium    | imide             |
| diethylmethylsulfonium<br>bis(trifluoromethylsulfonyl)imide   | 6.0 | 6.0  | sulfonium   | imide             |
| diethylmethylsulfonium ethyl sulfate                          | 4.8 | 5.8  | sulfonium   | sulfate           |
| diethylmethylsulfonium<br>bis(fluorosulfonyl)imide            | 6.4 | 8.4  | sulfonium   | imide             |
| ethylammonium triflate                                        | 4.4 | 16.7 | ammonium    | triflate          |
| ethylammonium bis(fluorosulfonyl)imide                        | 5.3 | 12.5 | ammonium    | imide             |
| triethylsulfonium<br>bis(trifluoromethylsulfonyl)imide        | 6.2 | 5.1  | sulfonium   | imide             |
| triethylsulfonium ethyl sulfate                               | 5.1 | 3.8  | sulfonium   | sulfate           |
| triethylsulfonium<br>bis(pentafluoroethylsulfonyl)imide       | 6.7 | 3.1  | sulfonium   | imide             |
| triethylsulfonium trifluoroacetate                            | 4.7 | 5.2  | sulfonium   | acetate           |
| triethylsulfonium bis(fluorosulfonyl)imide                    | 6.7 | 6.4  | sulfonium   | imide             |
| 1,2-dimethylimidazolium<br>bis(fluorosulfonyl)imide           | 6.3 | 5.2  | imidazolium | imide             |
| 1-methyl-3-pentylimidazolium nitrate                          | 4.4 | 4.0  | imidazolium | nitrate           |
| 1-ethylimidazolium nitrate                                    | 4.1 | 15.6 | imidazolium | nitrate           |
| 1-ethylimidazolium<br>bis(fluorosulfonyl)imide                | 6.3 | 7.5  | imidazolium | imide             |
| 1-propyl-2-methylpyridinium<br>bis(fluorosulfonyl)imide       | 6.5 | 6.1  | pyridinium  | imide             |
| n-ethyl-n-methyl-n-propylammonium<br>bis(fluorosulfonyl)imide | 6.4 | 6.9  | ammonium    | imide             |
| propylammonium triflate                                       | 4.4 | 9.5  | ammonium    | triflate          |
| propylammonium tetrafluoroborate                              | 7.5 | 15.1 | ammonium    | tetrafluoroborate |
| propylammonium bis(fluorosulfonyl)imide                       | 5.4 | 8.8  | ammonium    | imide             |

### Supplementary Table 6

The conductivity records stored in ILThermo for the 18 overlapped ILs.

| Number | Label                                             | Conductivity (mS cm <sup>-1</sup> )<br>25°C |          |          |
|--------|---------------------------------------------------|---------------------------------------------|----------|----------|
|        |                                                   | Record 1                                    | Record 2 | Record 3 |
| 1      | 1-butyl-3-methylimidazolium trifluoroacetate      | 3.1                                         | 3.32     | 4.55     |
| 2      | 1-butylpyridinium dicyanamide                     | 8.7                                         | 14.8     |          |
| 3      | 1-ethyl-3-methylimidazolium methyl sulfate        | 5.47                                        | 6.02     |          |
| 4      | propylammonium acetate                            | 0.43                                        | 0.6      |          |
| 5      | 1,2-dimethyl-3-propylimidazolium thiocyanate      | 4.59                                        |          |          |
| 6      | 1,3-dimethylimidazolium acetate                   | 2.86                                        |          |          |
| 7      | 1-butyl-2,3-dimethylimidazolium thiocyanate       | 2.17                                        |          |          |
| 8      | 1-butyl-3-ethylimidazolium bromide                | 0.502                                       |          |          |
| 9      | 1-butyl-3-methylimidazolium dihydrogen phosphate  | 4.19                                        |          |          |
| 10     | 1-ethyl-3-methylimidazolium trifluoroacetate      | 10                                          |          |          |
| 11     | 1-ethylpyridinium dicyanamide                     | 17.18                                       |          |          |
| 12     | 1-hexyl-3-methylimidazolium dicyanamide           | 5.17                                        |          |          |
| 13     | 1-hexylpyridinium dicyanamide                     | 4.6                                         |          |          |
| 14     | 1-methyl-3-pentylimidazolium dihydrogen phosphate | 2.43                                        |          |          |
| 15     | 1-methyl-3-propylimidazolium dicyanamide          | 17.46                                       |          |          |
| 16     | 1-propylpyridinium dicyanamide                    | 13.08                                       |          |          |
| 17     | 1-propylpyridinium tetrafluoroborate              | 4.01                                        |          |          |
| 18     | propylammonium formate                            | 3.6                                         |          |          |

### Supplementary Table 7

The  $t_{Li^+}$  of Bruce-Vincent analysis of the IPEs developed from different ILs.

| IPEs               | I <sub>ss</sub> (μA) | I <sub>o</sub> (μA) | R <sub>ss</sub> (Ω) | R <sub>o</sub> (Ω) | Polarization (mV) | $t_{Li^+}$ |
|--------------------|----------------------|---------------------|---------------------|--------------------|-------------------|------------|
| 10% PBDT C2mim TfO | 9.97                 | 18.8                | 470                 | 441                | 10                | 0.5        |
| 10% PBDT C2mim BF4 | 9.54                 | 26.2                | 450                 | 270                | 10                | 0.4        |
| 10% PBDT C2mim ES  | 9.54                 | 23.0                | 295                 | 223                | 10                | 0.4        |
| 10% PBDT Dems TFSI | 25.8                 | 50.9                | 478                 | 580                | 10                | 0.5        |

- 1 Ong, S. P., Andreussi, O., Wu, Y., Marzari, N. & Ceder, G. Electrochemical Windows of Room-Temperature Ionic Liquids from Molecular Dynamics and Density Functional Theory Calculations. *Chem Mater* **23**, 2979-2986, doi:10.1021/cm200679y (2011).
- 2 Kuusik, I., Kook, M., Pärna, R. & Kisand, V. Ionic Liquid Vapors in Vacuum: Possibility to Derive Anodic Stabilities from DFT and UPS. *ACS omega* **6**, 5255-5265, doi:10.1021/acsomega.0c05369 (2021).
